# Supplementary material for: Extracellular Matrix and Oxidative Phosphorylation: Important Role in the Regulation of Hypothalamic Function by Gut Microbiota
Source: Front Genet. 2020 Jun 25;11:520. doi: 10.3389/fgene.2020.00520 (PMC7330020; doi:10.3389/fgene.2020.00520)
Supplement: Supplementary file 2 [file Table_1.XLS]

## Sheet: 比对结果统计表
Sample	Total reads	Total mapped	Multiple mapped	Uniquely mapped
C1	56236800	53346225(94.86%)	3303352(5.87%)	50042873(88.99%)
C2	49651722	47103574(94.87%)	2530114(5.1%)	44573460(89.77%)
C3	55098956	53086063(96.35%)	3615520(6.56%)	49470543(89.78%)
G1	47299574	45885152(97.01%)	3059209(6.47%)	42825943(90.54%)
G2	55696396	51125214(91.79%)	3649175(6.55%)	47476039(85.24%)
G3	50115828	47786650(95.35%)	3576740(7.14%)	44209910(88.22%)
H1	42608506	41085536(96.43%)	3252727(7.63%)	37832809(88.79%)
H2	50582702	47661803(94.23%)	3794883(7.5%)	43866920(86.72%)
H3	42764944	40844671(95.51%)	3668315(8.58%)	37176356(86.93%)
M1	53469530	51532235(96.38%)	2951361(5.52%)	48580874(90.86%)
M2	45695030	40993307(89.71%)	2542145(5.56%)	38451162(84.15%)
M3	47438574	45136512(95.15%)	2591771(5.46%)	42544741(89.68%)
