# Supplementary material for: Extracellular Matrix and Oxidative Phosphorylation: Important Role in the Regulation of Hypothalamic Function by Gut Microbiota
Source: Front Genet. 2020 Jun 25;11:520. doi: 10.3389/fgene.2020.00520 (PMC7330020; doi:10.3389/fgene.2020.00520)
Supplement: Supplementary file 11 [file Table_10.XLS]

## Sheet: KEGG富集分析统计表
<label class="checkAll" style="cursor:pointer;padding-top:2px;"><i class="icon-check-empty" style="margin-right:5px;"></i>Num</label>	Pathway id	Description	Database	Ratio_in_study	Ratio_in_pop	Pvalue_uncorrected	Pvalue_corrected
6	map04974	Protein digestion and absorption	KEGG PATHWAY	6/113	97/22848	8.77476e-06	0.000522098
6	map04512	ECM-receptor interaction	KEGG PATHWAY	6/113	88/22848	4.98894e-06	0.000593684
8	map04510	Focal adhesion	KEGG PATHWAY	8/113	312/22848	0.000163476	0.00648455
8	map04010	MAPK signaling pathway	KEGG PATHWAY	8/113	328/22848	0.000229538	0.00682876
4	map04933	AGE-RAGE signaling pathway in diabetic complications	KEGG PATHWAY	4/113	130/22848	0.00399476	0.0950752
5	map05146	Amoebiasis	KEGG PATHWAY	5/113	247/22848	0.00773285	0.102246
4	map05222	Small cell lung cancer	KEGG PATHWAY	4/113	152/22848	0.00692104	0.102951
3	map04370	VEGF signaling pathway	KEGG PATHWAY	3/113	75/22848	0.00614219	0.104417
3	map00310	Lysine degradation	KEGG PATHWAY	3/113	71/22848	0.00527356	0.104592
3	map04925	Aldosterone synthesis and secretion	KEGG PATHWAY	3/113	115/22848	0.0194892	0.231921
3	map00564	Glycerophospholipid metabolism	KEGG PATHWAY	3/113	120/22848	0.0217803	0.235623
3	map05231	Choline metabolism in cancer	KEGG PATHWAY	3/113	129/22848	0.02626	0.24038
3	map04713	Circadian entrainment	KEGG PATHWAY	3/113	133/22848	0.0283976	0.241379
3	map04070	Phosphatidylinositol signaling system	KEGG PATHWAY	3/113	126/22848	0.024716	0.2451
2	map04930	Type II diabetes mellitus	KEGG PATHWAY	2/113	69/22848	0.0458914	0.341317
1	map04711	Circadian rhythm - fly	KEGG PATHWAY	1/113	9/22848	0.0436486	0.346279
3	map04726	Serotonergic synapse	KEGG PATHWAY	3/113	171/22848	0.0531131	0.371792
3	map05100	Bacterial invasion of epithelial cells	KEGG PATHWAY	3/113	184/22848	0.0633277	0.418666
2	map00562	Inositol phosphate metabolism	KEGG PATHWAY	2/113	88/22848	0.0705325	0.441756
3	map04919	Thyroid hormone signaling pathway	KEGG PATHWAY	3/113	202/22848	0.0788458	0.469133
6	map05200	Pathways in cancer	KEGG PATHWAY	6/113	613/22848	0.0838838	0.475342
3	map04670	Leukocyte transendothelial migration	KEGG PATHWAY	3/113	218/22848	0.093893	0.485794
1	map04710	Circadian rhythm	KEGG PATHWAY	1/113	32/22848	0.146802	0.499128
2	map01522	Endocrine resistance	KEGG PATHWAY	2/113	119/22848	0.117451	0.499168
1	map00670	One carbon pool by folate	KEGG PATHWAY	1/113	33/22848	0.151028	0.499231
4	map05203	Viral carcinogenesis	KEGG PATHWAY	4/113	407/22848	0.143137	0.500981
6	map04151	PI3K-Akt signaling pathway	KEGG PATHWAY	6/113	702/22848	0.135051	0.502222
2	map04658	Th1 and Th2 cell differentiation	KEGG PATHWAY	2/113	147/22848	0.164694	0.502526
3	map04360	Axon guidance	KEGG PATHWAY	3/113	217/22848	0.0929198	0.502612
2	map04350	TGF-beta signaling pathway	KEGG PATHWAY	2/113	115/22848	0.111023	0.508145
2	map04724	Glutamatergic synapse	KEGG PATHWAY	2/113	134/22848	0.142325	0.513232
3	map04072	Phospholipase D signaling pathway	KEGG PATHWAY	3/113	282/22848	0.163938	0.513384
1	map00120	Primary bile acid biosynthesis	KEGG PATHWAY	1/113	25/22848	0.116634	0.514052
2	map00590	Arachidonic acid metabolism	KEGG PATHWAY	2/113	127/22848	0.130576	0.517953
2	map03320	PPAR signaling pathway	KEGG PATHWAY	2/113	127/22848	0.130576	0.517953
1	map04320	Dorso-ventral axis formation	KEGG PATHWAY	1/113	36/22848	0.163581	0.526111
1	map00592	alpha-Linolenic acid metabolism	KEGG PATHWAY	1/113	28/22848	0.12969	0.532178
1	map00514	Other types of O-glycan biosynthesis	KEGG PATHWAY	1/113	23/22848	0.107821	0.534615
1	map00531	Glycosaminoglycan degradation	KEGG PATHWAY	1/113	23/22848	0.107821	0.534615
1	map01523	Antifolate resistance	KEGG PATHWAY	1/113	40/22848	0.180032	0.535595
4	map05205	Proteoglycans in cancer	KEGG PATHWAY	4/113	459/22848	0.192715	0.546027
2	map04750	Inflammatory mediator regulation of TRP channels	KEGG PATHWAY	2/113	161/22848	0.189415	0.549764
1	map00510	N-Glycan biosynthesis	KEGG PATHWAY	1/113	47/22848	0.208053	0.575776
1	map02010	ABC transporters	KEGG PATHWAY	1/113	58/22848	0.250182	0.583757
1	map00565	Ether lipid metabolism	KEGG PATHWAY	1/113	57/22848	0.246445	0.58654
1	map00250	Alanine, aspartate and glutamate metabolism	KEGG PATHWAY	1/113	56/22848	0.242691	0.589392
3	map04810	Regulation of actin cytoskeleton	KEGG PATHWAY	3/113	341/22848	0.23837	0.590959
3	map04014	Ras signaling pathway	KEGG PATHWAY	3/113	335/22848	0.230518	0.596339
1	map00600	Sphingolipid metabolism	KEGG PATHWAY	1/113	52/22848	0.227486	0.601573
2	map05224	Breast cancer	KEGG PATHWAY	2/113	188/22848	0.238255	0.603242
1	map03022	Basal transcription factors	KEGG PATHWAY	1/113	62/22848	0.264944	0.606313
2	map04664	Fc epsilon RI signaling pathway	KEGG PATHWAY	2/113	181/22848	0.225495	0.609861
2	map05206	MicroRNAs in cancer	KEGG PATHWAY	2/113	207/22848	0.273033	0.613037
3	map04020	Calcium signaling pathway	KEGG PATHWAY	3/113	371/22848	0.278238	0.613155
1	map05221	Acute myeloid leukemia	KEGG PATHWAY	1/113	70/22848	0.293609	0.623919
1	map00591	Linoleic acid metabolism	KEGG PATHWAY	1/113	72/22848	0.3006	0.627569
1	map03420	Nucleotide excision repair	KEGG PATHWAY	1/113	69/22848	0.290087	0.627643
1	map05120	Epithelial cell signaling in Helicobacter pylori infection	KEGG PATHWAY	1/113	85/22848	0.344403	0.650538
1	map04330	Notch signaling pathway	KEGG PATHWAY	1/113	77/22848	0.317781	0.651998
1	map04730	Long-term depression	KEGG PATHWAY	1/113	77/22848	0.317781	0.651998
2	map04666	Fc gamma R-mediated phagocytosis	KEGG PATHWAY	2/113	244/22848	0.340389	0.653327
1	map04913	Ovarian steroidogenesis	KEGG PATHWAY	1/113	81/22848	0.331223	0.656925
1	map04978	Mineral absorption	KEGG PATHWAY	1/113	83/22848	0.337845	0.659075
1	map05223	Non-small cell lung cancer	KEGG PATHWAY	1/113	93/22848	0.369995	0.667112
3	map05202	Transcriptional misregulation in cancer	KEGG PATHWAY	3/113	436/22848	0.366048	0.67015
1	map05230	Central carbon metabolism in cancer	KEGG PATHWAY	1/113	96/22848	0.379334	0.673743
1	map00620	Pyruvate metabolism	KEGG PATHWAY	1/113	98/22848	0.385484	0.674598
1	map00561	Glycerolipid metabolism	KEGG PATHWAY	1/113	91/22848	0.363691	0.676238
1	map05214	Glioma	KEGG PATHWAY	1/113	108/22848	0.41534	0.716311
2	map04650	Natural killer cell mediated cytotoxicity	KEGG PATHWAY	2/113	307/22848	0.449879	0.733364
1	map04012	ErbB signaling pathway	KEGG PATHWAY	1/113	114/22848	0.432559	0.73535
1	map00330	Arginine and proline metabolism	KEGG PATHWAY	1/113	120/22848	0.449274	0.742551
1	map04912	GnRH signaling pathway	KEGG PATHWAY	1/113	118/22848	0.443757	0.743762
1	map03018	RNA degradation	KEGG PATHWAY	1/113	173/22848	0.577255	0.771836
1	map05145	Toxoplasmosis	KEGG PATHWAY	1/113	171/22848	0.57301	0.774866
2	map04015	Rap1 signaling pathway	KEGG PATHWAY	2/113	384/22848	0.568806	0.778022
2	map05418	Fluid shear stress and atherosclerosis	KEGG PATHWAY	2/113	329/22848	0.485736	0.781117
1	map04940	Type I diabetes mellitus	KEGG PATHWAY	1/113	187/22848	0.605821	0.80103
1	map04659	Th17 cell differentiation	KEGG PATHWAY	1/113	195/22848	0.621276	0.803607
1	map05131	Shigellosis	KEGG PATHWAY	1/113	145/22848	0.513827	0.804545
1	map05332	Graft-versus-host disease	KEGG PATHWAY	1/113	148/22848	0.521051	0.80526
1	map05110	Vibrio cholerae infection	KEGG PATHWAY	1/113	148/22848	0.521051	0.80526
1	map04550	Signaling pathways regulating pluripotency of stem cells	KEGG PATHWAY	1/113	169/22848	0.568723	0.805691
1	map04520	Adherens junction	KEGG PATHWAY	1/113	169/22848	0.568723	0.805691
1	map04722	Neurotrophin signaling pathway	KEGG PATHWAY	1/113	169/22848	0.568723	0.805691
1	map03008	Ribosome biogenesis in eukaryotes	KEGG PATHWAY	1/113	143/22848	0.508951	0.807536
2	map05168	Herpes simplex infection	KEGG PATHWAY	2/113	362/22848	0.536752	0.808525
1	map04270	Vascular smooth muscle contraction	KEGG PATHWAY	1/113	194/22848	0.619378	0.809955
1	map04922	Glucagon signaling pathway	KEGG PATHWAY	1/113	168/22848	0.566564	0.812302
1	map05132	Salmonella infection	KEGG PATHWAY	1/113	165/22848	0.560021	0.812713
1	map01521	EGFR tyrosine kinase inhibitor resistance	KEGG PATHWAY	1/113	207/22848	0.64334	0.814441
1	map04660	T cell receptor signaling pathway	KEGG PATHWAY	1/113	205/22848	0.639753	0.818609
1	map04068	FoxO signaling pathway	KEGG PATHWAY	1/113	164/22848	0.557818	0.81951
1	map04142	Lysosome	KEGG PATHWAY	1/113	163/22848	0.555604	0.826461
1	map04611	Platelet activation	KEGG PATHWAY	1/113	226/22848	0.675696	0.846399
1	map00230	Purine metabolism	KEGG PATHWAY	1/113	282/22848	0.755086	0.84769
1	map05320	Autoimmune thyroid disease	KEGG PATHWAY	1/113	266/22848	0.73461	0.848724
1	map04064	NF-kappa B signaling pathway	KEGG PATHWAY	1/113	266/22848	0.73461	0.848724
2	map04144	Endocytosis	KEGG PATHWAY	2/113	502/22848	0.713312	0.848841
2	map05166	HTLV-I infection	KEGG PATHWAY	2/113	476/22848	0.685375	0.84958
1	map04514	Cell adhesion molecules (CAMs)	KEGG PATHWAY	1/113	262/22848	0.729231	0.85077
1	map04921	Oxytocin signaling pathway	KEGG PATHWAY	1/113	279/22848	0.751369	0.851552
1	map05330	Allograft rejection	KEGG PATHWAY	1/113	249/22848	0.710994	0.854629
1	map04062	Chemokine signaling pathway	KEGG PATHWAY	1/113	240/22848	0.69766	0.855892
2	map05169	Epstein-Barr virus infection	KEGG PATHWAY	2/113	495/22848	0.705999	0.857285
1	map04612	Antigen processing and presentation	KEGG PATHWAY	1/113	261/22848	0.72787	0.857589
1	map04140	Autophagy - animal	KEGG PATHWAY	1/113	310/22848	0.787219	0.875506
1	map04390	Hippo signaling pathway	KEGG PATHWAY	1/113	335/22848	0.812358	0.895098
1	map04530	Tight junction	KEGG PATHWAY	1/113	366/22848	0.839477	0.899979
1	map05152	Tuberculosis	KEGG PATHWAY	1/113	379/22848	0.849657	0.902761
1	map05034	Alcoholism	KEGG PATHWAY	1/113	361/22848	0.835381	0.903731
1	map05416	Viral myocarditis	KEGG PATHWAY	1/113	357/22848	0.832031	0.908364
1	map03013	RNA transport	KEGG PATHWAY	1/113	402/22848	0.866126	0.912115
1	map03040	Spliceosome	KEGG PATHWAY	1/113	432/22848	0.884948	0.923761
1	map04145	Phagosome	KEGG PATHWAY	1/113	481/22848	0.910209	0.933749
1	map05016	Huntington's disease	KEGG PATHWAY	1/113	468/22848	0.9041	0.935547
1	map00010	Glycolysis / Gluconeogenesis	KEGG PATHWAY	1/113	571/22848	0.943132	0.959254
1	map04066	HIF-1 signaling pathway	KEGG PATHWAY	1/113	659/22848	0.963681	0.971848
1	map03010	Ribosome	KEGG PATHWAY	1/113	2254/22848	0.999992	0.999992
